# Supplementary material for: Nanocrystalline cubic ruthenium carbide formation in the synthesis of graphene on ruthenium ultrathin films
Source: Royal Society of Chemistry journal article supplement (doi:10.1039/c7tc02855e), 2017-01-01
Supplement: c7tc02855e1.pdf [file c7tc02855e1.pdf]

## Electronic Supplementary Information (ESI)

# Nanocrystalline Cubic Ruthenium Carbide Formation in the Synthesis of Graphene on Ruthenium Ultrathin Films

*Félix Jiménez-Villacorta<sup>1</sup>, Leo Álvarez-Fraga<sup>1</sup>, Javier Bartolomé<sup>1</sup>, Esteban Climent-Pascual<sup>1,2</sup>, Eduardo Salas-Colera<sup>1,3</sup>, Montse Aguilar-Pujol<sup>1</sup>, Rafael Ramírez-Jiménez<sup>4</sup>, Ana Cremades<sup>5</sup>, Carlos Prieto<sup>1</sup> and Alicia de Andrés<sup>1\*</sup>*

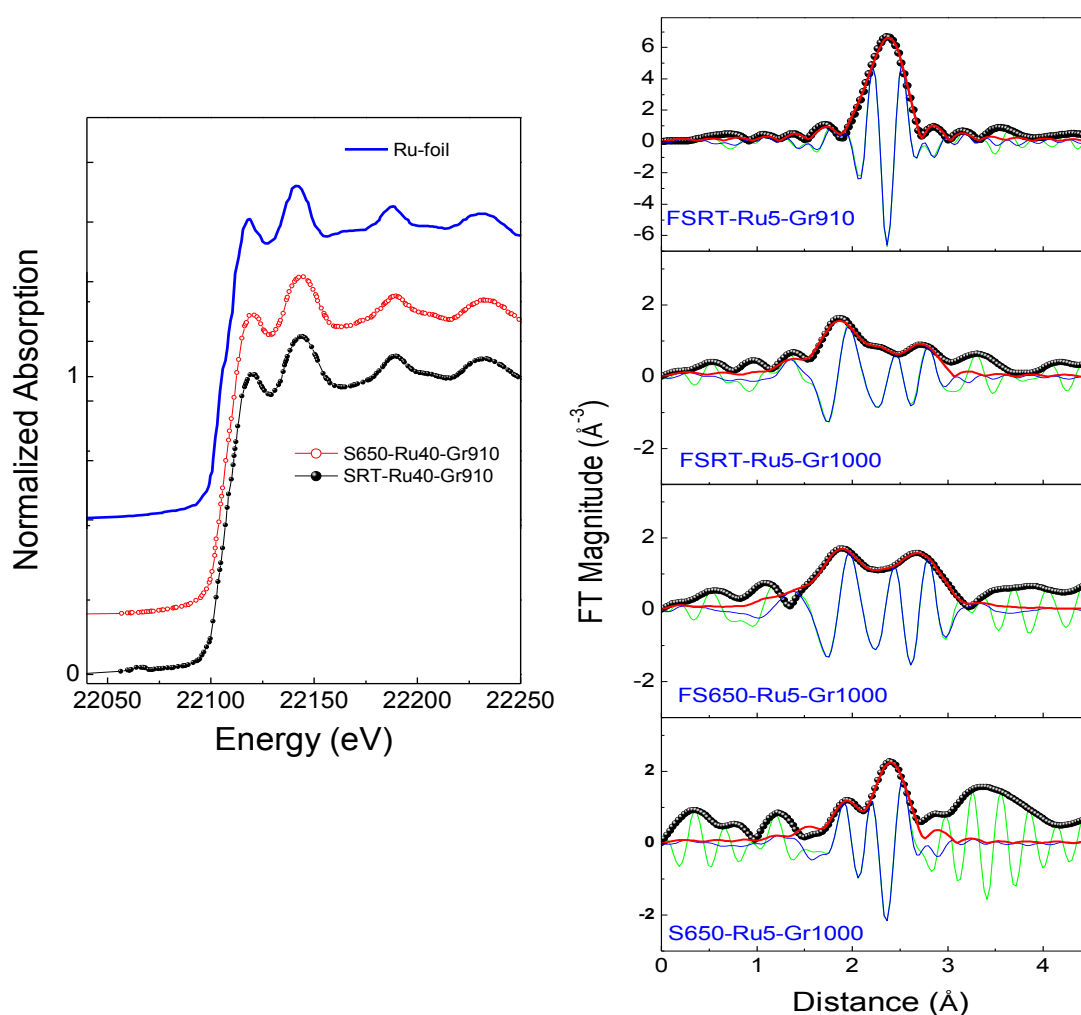

**Figure S1.** Left panel: Ru XANES spectra of 40 nm thick Ru films grown on sapphire at RT and 650 °C with graphene synthesized at  $T_{CVD} = 910$  °C. Ru-foil spectrum is given also for comparison. Right panels: Ru K-edge EXAFS fits of representative samples with graphene. Black dots: FT module experiment; green line: FT imaginary part experiment; red line: FT module simulation; blue line: FT imaginary part simulation. spectrum is given also for comparison.

**Table S1.** Results obtained from the fits of the EXAFS spectra of samples with and without graphene obtained at different CVD temperatures ( $T_{\text{CVD}}$ ) on fused silica and sapphire. Ru foil results are also included as reference. The asterisks signal the pairs related to the new ruthenium carbide phase.

| <i>Sample</i>    | <i>Substrate</i> | $T_S$<br>(°C) | $T_{\text{CVD}}$<br>(°C) | <i>pair</i> | $N_j$   | $R_j$<br>(Å) | $\sigma^2$<br>(Å <sup>2</sup> ) |
|------------------|------------------|---------------|--------------------------|-------------|---------|--------------|---------------------------------|
| Ru foil          |                  |               |                          | Ru-Ru       | 6.0     | 2.64         | 0.0024                          |
|                  |                  |               |                          | Ru-Ru       | 6.0     | 2.73         | 0.0036                          |
| FSRT-Ru5-910     | Fused Silica     | RT            | 910                      | Ru-Ru       | 6.0±0.3 | 2.64         | 0.0017                          |
|                  |                  |               |                          | Ru-Ru       | 6.0±0.3 | 2.74         | 0.0036                          |
| FSRT-Ru5-Gr910   | Fused Silica     | RT            | 910                      | Ru-Ru       | 5.6±0.3 | 2.64         | 0.002                           |
|                  |                  |               |                          | Ru-Ru       | 5.6±0.3 | 2.73         | 0.0028                          |
| FSRT-Ru5-1000    | Fused Silica     | RT            | 1000                     | Ru-Ru       | 6.0±0.3 | 2.62         | 0.0015                          |
|                  |                  |               |                          | Ru-Ru       | 6.0±0.3 | 2.74         | 0.0024                          |
| FSRT-Ru5-Gr1000  | Fused Silica     | RT            | 1000                     | Ru-Ru       | 3.0±0.5 | 2.59         | 0.0098                          |
|                  |                  |               |                          | *Ru-C       | 6.0±0.5 | 2.31         | 0.0002                          |
|                  |                  |               |                          | *Ru-Ru      | 6.0±0.5 | 2.93         | 0.0074                          |
| FS650-Ru5-1000   | Fused Silica     | 650           | 1000                     | Ru-Ru       | 6.0±0.3 | 2.64         | 0.0024                          |
|                  |                  |               |                          | Ru-Ru       | 6.0±0.3 | 2.73         | 0.0035                          |
| FS650-Ru5-Gr1000 | Fused Silica     | 650           | 1000                     | Ru-Ru       | 3.1±0.5 | 2.57         | 0.0066                          |
|                  |                  |               |                          | *Ru-C       | 6.0±0.5 | 2.31         | 0.0010                          |
|                  |                  |               |                          | *Ru-Ru      | 7.1±0.5 | 2.95         | 0.0074                          |
| SRT-Ru40-910     | Sapphire         | RT            | 910                      | Ru-Ru       | 6.0±0.3 | 2.60         | 0.0011                          |
|                  |                  |               |                          | Ru-Ru       | 6.0±0.3 | 2.72         | 0.0021                          |
| S650-Ru40-Gr910  | Sapphire         | 650           | 910                      | Ru-Ru       | 6.0±0.3 | 2.61         | 0.0023                          |
|                  |                  |               |                          | Ru-Ru       | 6.0±0.3 | 2.71         | 0.0013                          |
| S650-Ru5-1000    | Sapphire         | 650           | 1000                     | Ru-Ru       | 6.0±0.3 | 2.64         | 0.0020                          |
|                  |                  |               |                          | Ru-Ru       | 6.0±0.3 | 2.72         | 0.0056                          |
| S650-Ru5-Gr1000  | Sapphire         | 650           | 1000                     | Ru-Ru       | 4.8±0.5 | 2.67         | 0.0048                          |
|                  |                  |               |                          | *Ru-C       | 3.2±0.5 | 2.32         | 0.0002                          |

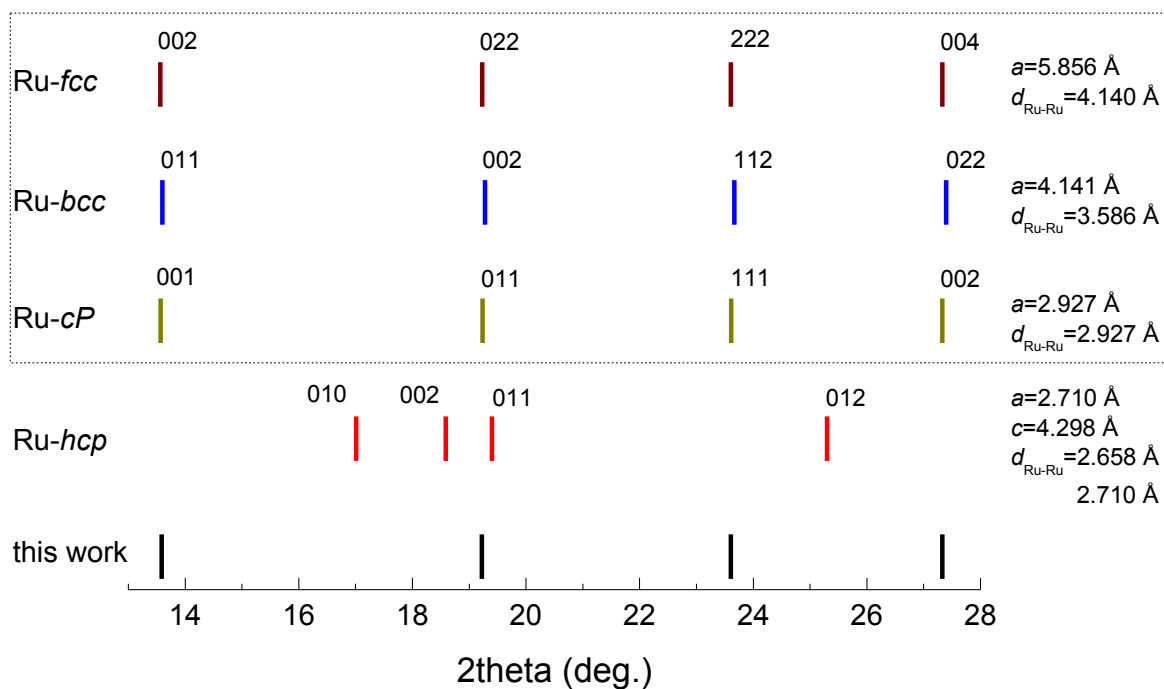

**Figure S2.** Observed new diffraction maxima ( $13.58^\circ$ ,  $19.22^\circ$ ,  $23.60^\circ$  and  $27.33^\circ$ ), (black tick marks) which cannot be indexed considering the hexagonal phase of the metallic ruthenium (red tick marks). Their analysis indicates that these maxima can be indexed by assuming a primitive cubic cell ( $d_{\text{Ru-Ru}} = 2.927 \text{ \AA}$ ), a body-centered cubic cell ( $d_{\text{Ru-Ru}} = 3.586 \text{ \AA}$ ) or a face-centered cubic cell ( $d_{\text{Ru-Ru}} = 4.140 \text{ \AA}$ ), dark yellow, blue and wine tick marks, respectively. However, only the primitive cubic (*cP*) cell is compatible with the EXAFS Ru-Ru and Ru-C interatomic distances ( $d_{\text{Ru-Ru}} = 2.93 \text{ \AA}$  and  $d_{\text{Ru-C}} = 2.31 \text{ \AA}$ ). Moreover, Ru-Ru distances resulting from the fits to *fcc* and *bcc* structures ( $4.140 \text{ \AA}$  and  $3.586 \text{ \AA}$ ) are not realistic values.

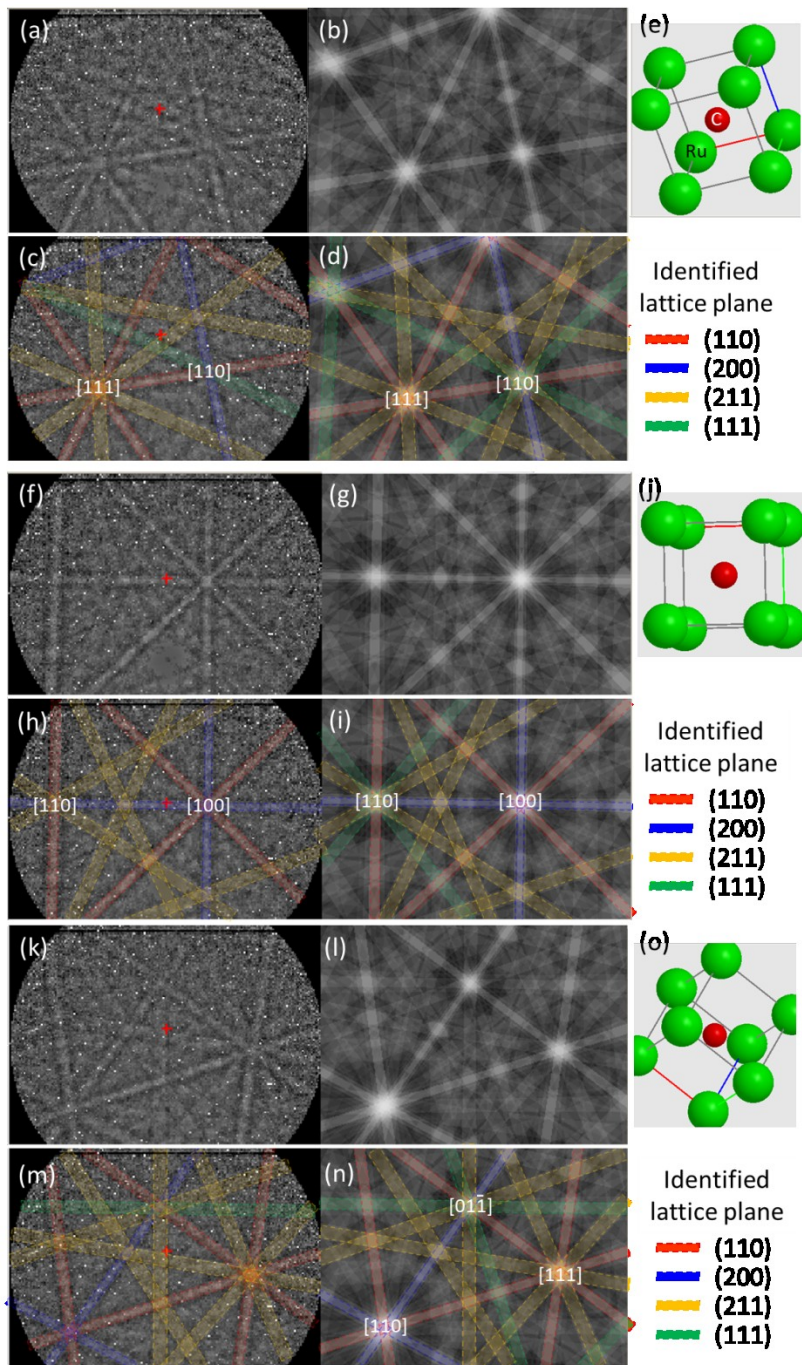

**Figure S3.** (a, b, f, g, k and l) Experimental EBSD patterns recorded at three different RuC grains, and comparison with the simulated Kikuchi bands for a cubic phase with lattice parameter of 2.927 Å, and crystalline orientation according to sketches shown in (e, j and o) respectively. (c, d, h, i, m and n) Same as before with overlapped low-index lattice planes and poles. Note that only clearly visible bands have been overlapped in the experimental patterns.
